# Supplementary material for: Evaluation of SMOS L4 Sea Surface Salinity Product in the Western Iberian Coast
Source: MDPI journal article supplement (doi:10.3390/rs14020423), 2022-01-17
Supplement: s1 [file s1]

## Supplementary Materials

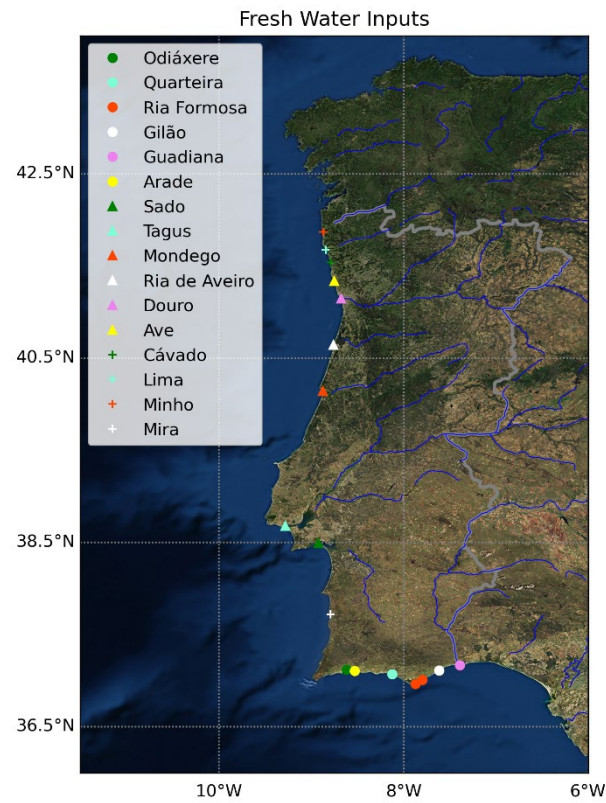

**Figure S1.** Rivers considered in the analysis.

**Table S1.** Coefficient of determination ( $R^2$ ) obtained by comparing the data from the different parameters with the concomitant salinity error (satellite-in situ). N corresponds to the number of matchups considered.

| Parameters                     | Statistic | Region A | Region B | Region C | Region D | Region E | Autumn 2018 | Spring 2019 | Autumn 2019 | All   |
|--------------------------------|-----------|----------|----------|----------|----------|----------|-------------|-------------|-------------|-------|
| Temperature                    | $R^2$     | 0.245    | 0.111    | 0.071    | 0.034    | 0.365    | 0.047       | 0.393       | 0.000       | 0.001 |
|                                | N         | 138      | 170      | 38       | 14       | 226      | 193         | 184         | 209         | 586   |
| Turbidity                      | $R^2$     | 0.093    | 0.152    | 0.175    | 0.012    | 0.029    | 0.004       | 0.03        | 0.097       | 0.056 |
|                                | N         | 126      | 153      | 37       | 13       | 112      | 137         | 142         | 162         | 441   |
| $PO_4$                         | $R^2$     | 0.000    | 0.000    | 0.001    | 0.009    | 0.046    | 0.039       | 0.009       | 0.031       | 0.014 |
|                                | N         | 124      | 151      | 37       | 13       | 112      | 136         | 141         | 161         | 437   |
| $NO_x$                         | $R^2$     | 0.032    | 0.003    | 0.109    | 0.003    | 0.040    | 0.002       | 0.007       | 0.030       | 0.001 |
|                                | N         | 124      | 151      | 37       | 13       | 112      | 136         | 141         | 160         | 437   |
| $SiO_2$                        | $R^2$     | 0.044    | 0.041    | 0.001    | 0.018    | 0.020    | 0.008       | 0.038       | 0.022       | 0.038 |
|                                | N         | 126      | 151      | 37       | 13       | 112      | 136         | 162         | 141         | 439   |
| Chlorophyll- <i>a</i>          | $R^2$     | 0.203    | 0.032    | 0.099    | 0.039    | 0.023    | 0.031       | 0.159       | 0.003       | 0.157 |
|                                | N         | 126      | 153      | 37       | 12       | 111      | 135         | 142         | 162         | 439   |
| Distance to the coast          | $R^2$     | 0.001    | 0.002    | 0.000    | 0.000    | 0.095    | 0.028       | 0.010       | 0.130       | 0.004 |
|                                | N         | 138      | 170      | 38       | 14       | 226      | 193         | 184         | 195         | 586   |
| Distance to the closest rivers | $R^2$     | 0.003    | 0.001    | 0.048    | 0.032    | 0.010    | 0.086       | 0.034       | 0.006       | 0.000 |
|                                | N         | 138      | 170      | 38       | 14       | 226      | 193         | 184         | 209         | 586   |
| Sea Surface Temperature error  | $R^2$     | 0.314    | 0.024    | 0.427    | 0.007    | 0.061    | 0.011       | 0.492       | 0.012       | 0.175 |
|                                | N         | 138      | 170      | 38       | 14       | 226      | 193         | 184         | 209         | 586   |
